# Supplementary material for: In situ phase-reconfiguration to synthesize Ru, B co-doped nickel phosphide for energy-efficient hydrogen generation in alkaline electrolytes
Source: Royal Society of Chemistry journal article supplement (doi:10.1039/d2ta02685f), 2022-01-01
Supplement: d2ta02685f2.pdf [file d2ta02685f2.pdf]

## *Supporting Information*

### **In-situ Phase-reconfiguration to Synthesize Ru, B Co-doped Nickel Phosphide for Energy-efficient Hydrogen Generation in Alkaline Electrolyte**

Yonglong Wang<sup>1</sup>, Qingshan Sun<sup>1</sup>, Zixuan Wang<sup>1</sup>, Weiping Xiao<sup>2</sup>, Yunlei Fu<sup>3</sup>, Tianyi Ma<sup>4</sup>, Zexing Wu<sup>\*1</sup>, Lei Wang<sup>\*1,3</sup>

1. Key Laboratory of Eco-chemical Engineering, Ministry of Education, International Science and Technology Cooperation Base of Eco-chemical Engineering and Green Manufacturing, College of Chemistry and Molecular Engineering, Qingdao University of Science and Technology, Qingdao 266042, P. R. China. E-mail: splswzx@qust.edu.cn; inorchemwl@126.com

2. College of Science, Nanjing Forestry University, Nanjing, 210037, PR China

3. Shandong Engineering Research Center for Marine Environment Corrosion and Safety Protection, College of Environment and Safety Engineering, Qingdao University of Science and Technology, Qingdao, 266042, PR China.

4. School of Science, RMIT University, Melbourne, VIC 3000, Australia.

## Physical Characterization

The crystal structure of the prepared samples was analyzed by x-ray diffraction (XRD), and the XRD of the samples was tested using a Rigaku Ultima IV at 40 kV and 40 mA through a rate of 5°/minute. and the morphology of the prepared samples was characterized by scanning electron microscopy (SEM JEOL, JSM-7500F) and transmission electron microscopy (TEM JEOL, JSM-7500F), and the elemental composition of the samples was studied by x-ray photoelectron spectroscopy (XPS AXIS SUPRA).

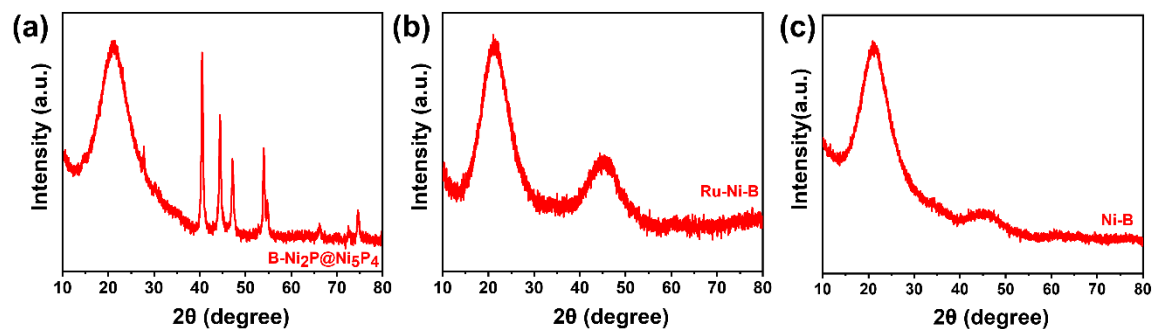

Figure S1. XRD patterns of B-Ni<sub>2</sub>P/Ni<sub>5</sub>P<sub>4</sub>, Ru-Ni-B and Ni-B.

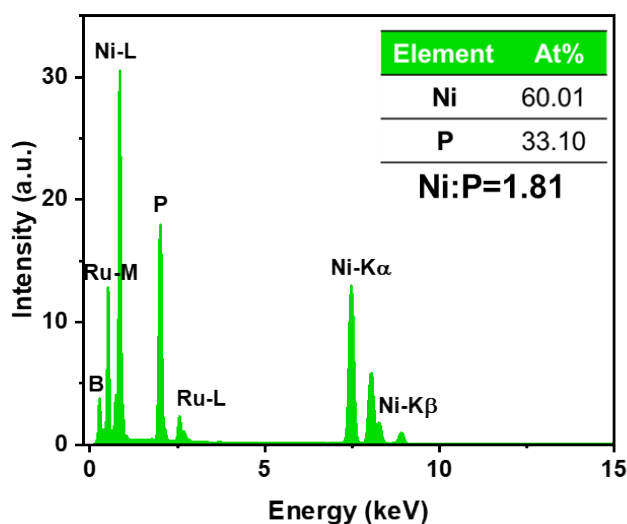

Figure S2. EDX spectrum of Ru/B-Ni<sub>2</sub>P/Ni<sub>5</sub>P<sub>4</sub>.

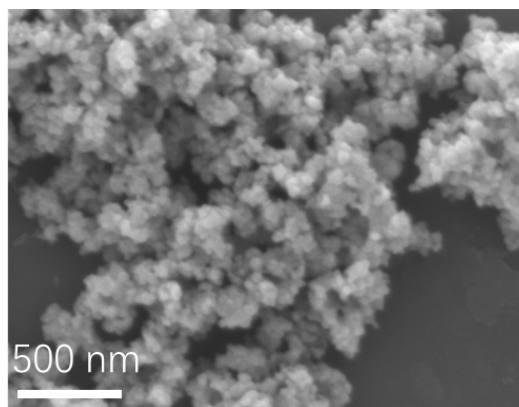

Figure S3. SEM images of Ru/B-Ni<sub>2</sub>P/Ni<sub>5</sub>P<sub>4</sub>.

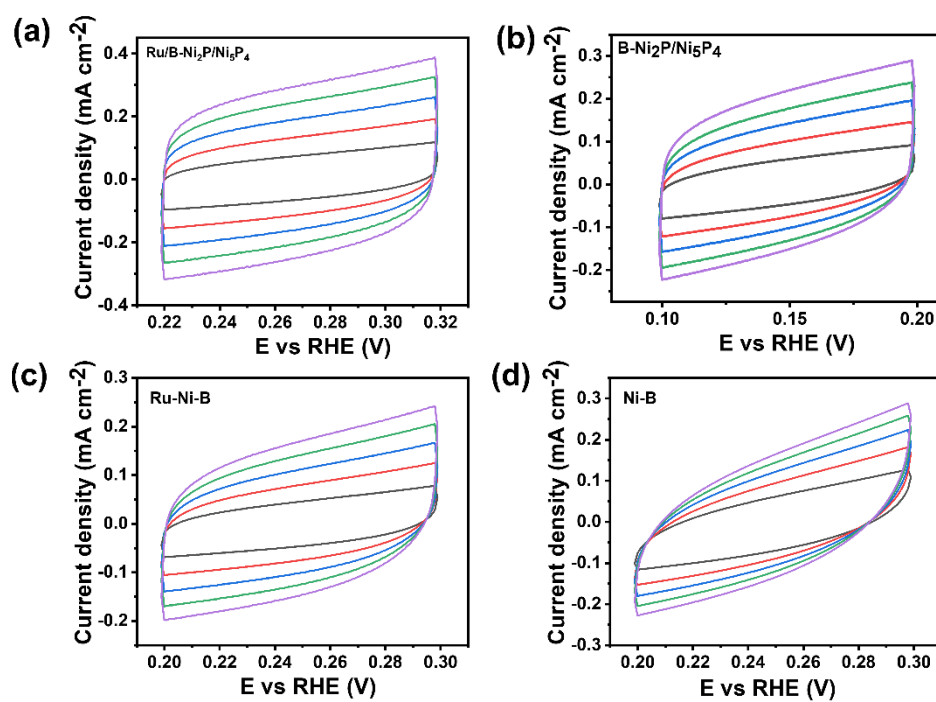

Figure S4. The CV curves of Ru/B-Ni<sub>2</sub>P/Ni<sub>5</sub>P<sub>4</sub>, B-Ni<sub>2</sub>P/Ni<sub>5</sub>P<sub>4</sub>, Ru-Ni-B, and Ni-B at 20 mV S<sup>-1</sup>-100 mV S<sup>-1</sup> sweep rate.

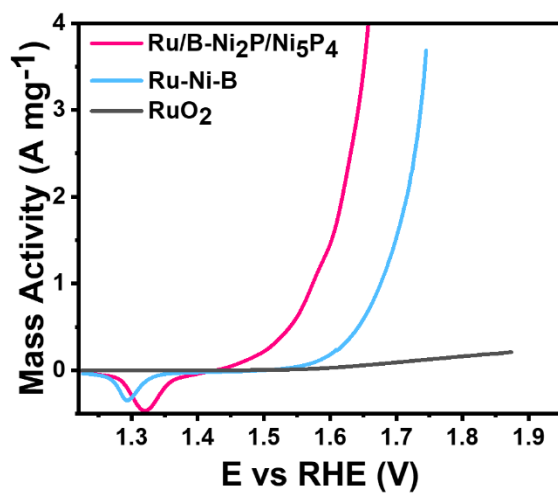

Figure S5. The mass activity curve of precious metal Ru.

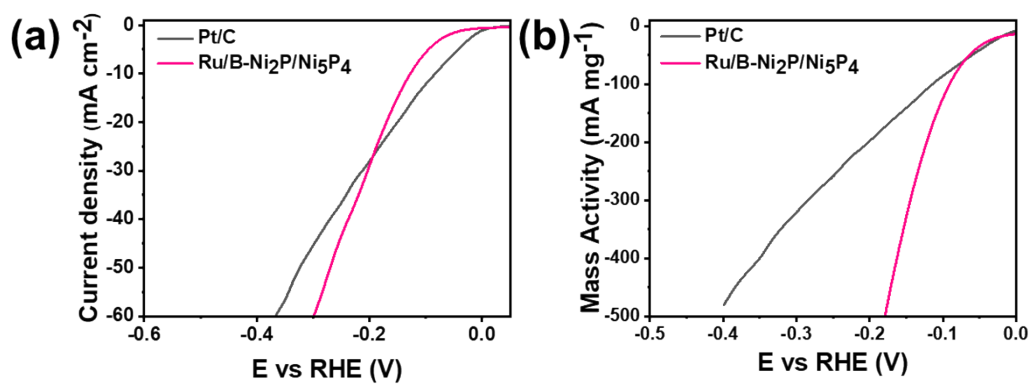

Figure S6. (a) The LSV curves of Ru/B-Ni<sub>2</sub>P/Ni<sub>5</sub>P<sub>4</sub>. (b) The mass activity curve of Ru/B-Ni<sub>2</sub>P/Ni<sub>5</sub>P<sub>4</sub> and Pt/C

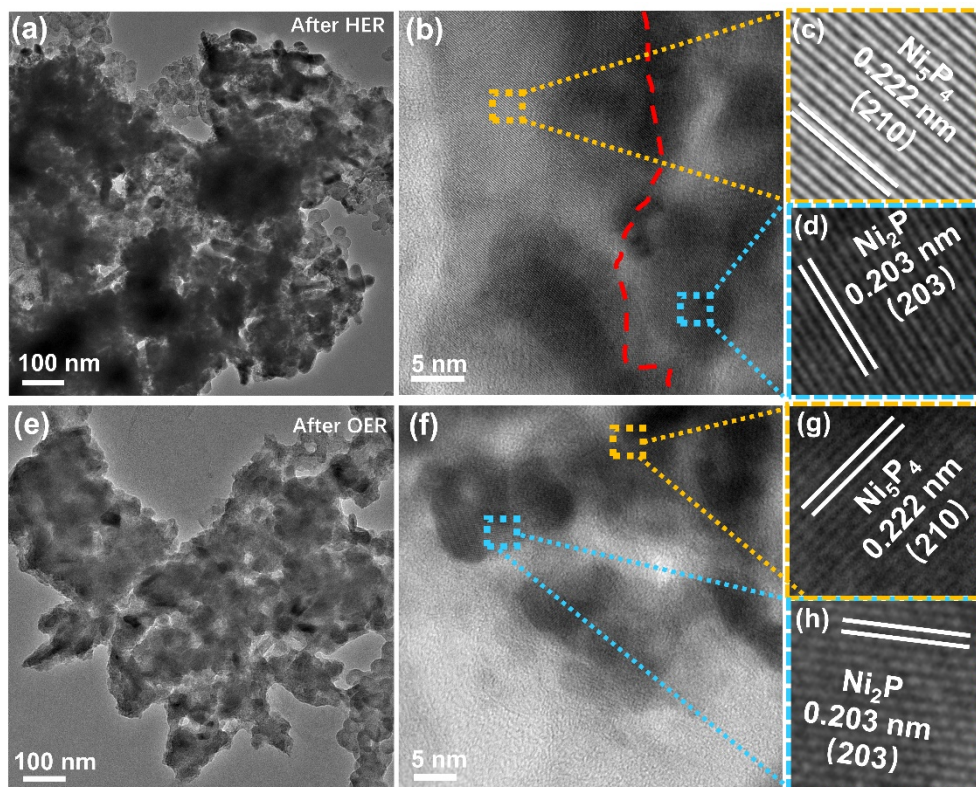

**Figure S7.** The TEM images of (a-d) and (e-h) for Ru/B-Ni<sub>2</sub>P/Ni<sub>5</sub>P<sub>4</sub> after HER and OER, respectively.

**Table S1.** Comparison of OER activity in 1M KOH for various electrocatalysts.

| Electrocatalysts                | Overpotential at 10 mA cm <sup>-2</sup> | Tafel slope              | Reference |
|---------------------------------|-----------------------------------------|--------------------------|-----------|
| NiSe <sub>2</sub> /NF           | 279 mV                                  | 97 mV dec <sup>-1</sup>  | 1         |
| Ni <sub>3</sub> N-NiMoN-5       | 277 mV                                  | 118 mV dec <sup>-1</sup> | 2         |
| Ni <sub>2</sub> P nanosheets    | 320 mV                                  | 105 mV dec <sup>-1</sup> | 3         |
| (Ru-Co)O <sub>x</sub> -350      | 265 mV                                  | 60 mV dec <sup>-1</sup>  | 4         |
| Ni <sub>2</sub> P-CoP           | 320 mV                                  | 69 mV dec <sup>-1</sup>  | 5         |
| NiCoP/C                         | 330 mV                                  | 96 mV dec <sup>-1</sup>  | 6         |
| N-doped NiCoP <sub>x</sub> /NCF | 298 mV                                  | 60 mV dec <sup>-1</sup>  | 7         |

|                                                    |               |                                 |    |
|----------------------------------------------------|---------------|---------------------------------|----|
| NiCo <sub>2-x</sub> Fe <sub>x</sub> O <sub>4</sub> | 274 mV        | 42 mV dec <sup>-1</sup>         | 8  |
| CoRu-MoS <sub>2</sub>                              | 308 mV        | 50 mV dec <sup>-1</sup>         | 9  |
| NiMoRuO                                            | 280 mV        | 100 mV dec <sup>-1</sup>        | 10 |
| 1-RuO <sub>2</sub> /CeO <sub>2</sub>               | 350 mV        | 74 mV dec <sup>-1</sup>         | 11 |
| Ni <sub>2-x</sub> Ru <sub>x</sub> P                | 340 mV        | NA                              | 12 |
| Ru-FeRu@C/NC                                       | 345 mV        | 64.7 mV dec <sup>-1</sup>       | 13 |
| Ru-MoS <sub>2</sub> -Mo <sub>2</sub> C             | 280 mV        | 202 mV dec <sup>-1</sup>        | 14 |
| <b>This Work</b>                                   | <b>270 mV</b> | <b>46.7 mV dec<sup>-1</sup></b> |    |

**Table S2.** Comparison of HER activity in 1M KOH for various electrocatalysts.

| Electrocatalysts                                       | Overpotential at 10 mA cm <sup>-2</sup> | Tafel slope              | Reference |
|--------------------------------------------------------|-----------------------------------------|--------------------------|-----------|
| Ni <sub>2</sub> P-CoP HNSA/CC                          | 40 mV                                   | 120 mV dec <sup>-1</sup> | 15        |
| Mn-Ni <sub>2</sub> P/NF                                | 103 mV@20mAcm <sup>-2</sup>             | 135 mV dec <sup>-1</sup> | 16        |
| Ni <sub>2</sub> P NPs/CC                               | 73 mV                                   | 73 mV dec <sup>-1</sup>  | 17        |
| Ni <sub>2</sub> P-Ni <sub>5</sub> P <sub>4</sub>       | 102 mV                                  | 83 mV dec <sup>-1</sup>  | 18        |
| H-FeNiP                                                | 87 mV                                   | 88 mV dec <sup>-1</sup>  | 19        |
| Ni <sub>5</sub> P <sub>4</sub> -Ru                     | 54 mV                                   | 52 mV dec <sup>-1</sup>  | 20        |
| Te/FeNiOOH-NCs                                         | 167 mV                                  | 93 mV dec <sup>-1</sup>  | 21        |
| Ru/C-Ti <sub>3</sub> C <sub>2</sub> T <sub>x</sub> /NF | 37 mV                                   | 60 mV dec <sup>-1</sup>  | 22        |
| NiSe@NiFe-LDH/NF                                       | 68 mV                                   | 106 mV dec <sup>-1</sup> | 23        |
| Ru-NiFe-P                                              | 44 mV                                   | 80 mV dec <sup>-1</sup>  | 24        |
| Ru-MnFeP/NF                                            | 35 mV                                   | 36 mV dec <sup>-1</sup>  | 25        |

|                                                        |              |                                 |    |
|--------------------------------------------------------|--------------|---------------------------------|----|
| Ru-NiCoP/NF                                            | 44 mV        | 45.4 mV dec <sup>-1</sup>       | 26 |
| Ru <sub>0.10</sub> @2H-MoS <sub>2</sub>                | 51 mV        | 64.9 mV dec <sup>-1</sup>       | 27 |
| Ru-FeRu@C/NC                                           | 23 mV        | 23.7 mV dec <sup>-1</sup>       | 28 |
| Ru-Co <sub>2</sub> P/N-C/NF                            | 65 mV        | 65 mV dec <sup>-1</sup>         | 29 |
| Ru/C-Ti <sub>3</sub> C <sub>2</sub> T <sub>x</sub> /NF | 37 mV        | 60 mV dec <sup>-1</sup>         | 30 |
| Ru-MoS <sub>2</sub> -Mo <sub>2</sub> C                 | 25 mV        | 58 mV dec <sup>-1</sup>         | 31 |
| Vs-Ru-Ni <sub>9</sub> S <sub>8</sub>                   | 56 mV        | 46.8 mV dec <sup>-1</sup>       | 32 |
| <b>This Work</b>                                       | <b>34 mV</b> | <b>57.5 mV dec<sup>-1</sup></b> |    |

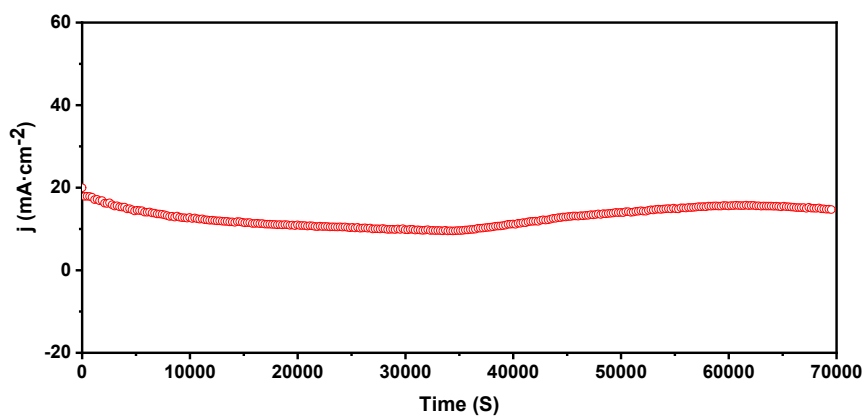

**Figure S8.** the *i*-*t* curves of the assembled electrodes in the UOR || HER system.

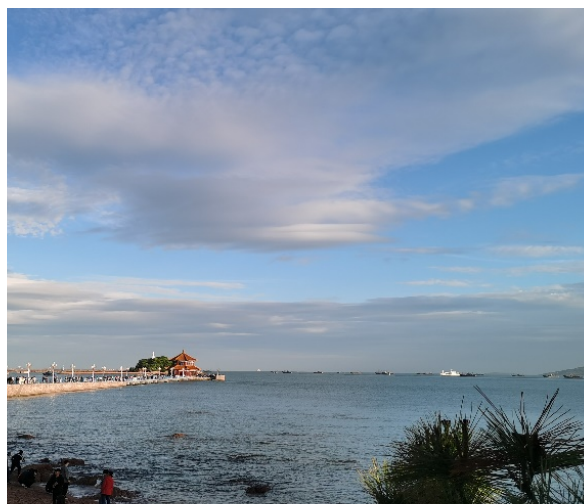

**Figure S9.** The photo of the location where the seawater was obtained.

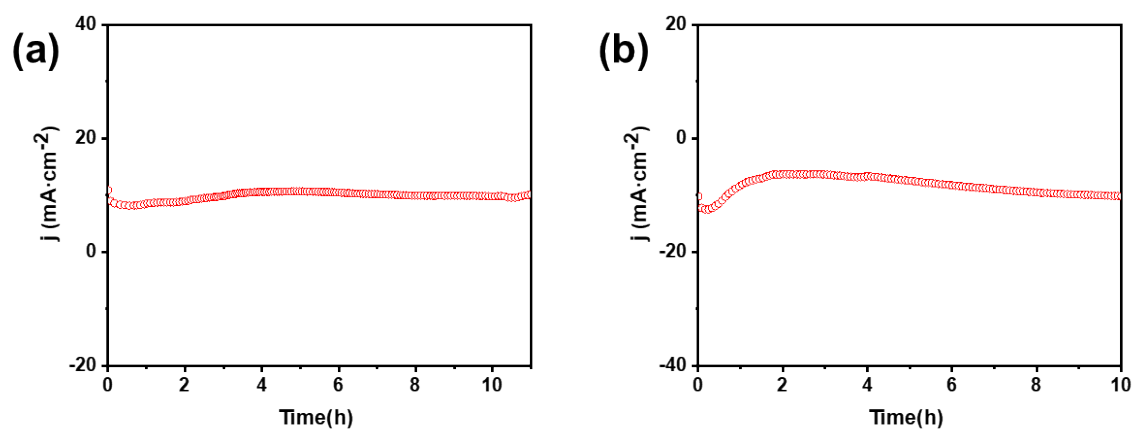

**Figure S10.** the  $i$ - $t$  curves of the assembled electrodes in the 1 M KOH + seawater. (a) OER, (b) HER.



## References

- 1 J. Zhu and Y. Ni, *Crystengcomm*, 2018, **20**, 3344-3352.
- 2 A. Wu, Y. Xie, H. Ma, C. Tian, Y. Gu, H. Yan, X. Zhang, G. Yang and H. Fu, *Nano Energy*, 2018, **44**, 353-363.
- 3 Q. Wang, Z. Liu, H. Zhao, H. Huang, H. Jiao and Y. Du, *J. Mater. Chem. A*, 2018, **6**, 18720-18727.
- 4 C. Wang, H. Shang, J. Li, Y. Wang, H. Xu, C. Wang, J. Guo and Y. Du, *Chem. Eng. J.*, 2021, **420**, 129805.
- 5 Y. Feng, C. Xu, E. Hu, B. Xia, J. Ning, C. Zheng, Y. Zhong, Z. Zhang and Y. Hu, *Journal of materials chemistry. A, Materials for energy and sustainability*, 2018, **6**, 14103-14111.
- 6 P. He, X. Yu and X. W. D. Lou, *Angewandte Chemie International Edition*, 2017, **56**, 3897-3900.
- 7 R. Jin, J. Huang, G. Chen, W. Chen, B. Ouyang, D. Chen, E. Kan, H. Zhu, C. Li, D. Yang and K. K. Ostrikov, *Chem. Eng. J.*, 2020, **402**, 126257.
- 8 R. Jin, J. Huang, G. Chen, W. Chen, B. Ouyang, D. Chen, E. Kan, H. Zhu, C. Li, D. Yang and K. K. Ostrikov, *Chem. Eng. J.*, 2020, **402**, 126257.
- 9 I. S. Kwon, T. T. Debela, I. H. Kwak, Y. C. Park, J. Seo, J. Y. Shim, S. J. Yoo, J. G. Kim, J. Park and H. S. Kang, *Small*, 2020, **16**, 2000081.
- 10 Z. Zhang, H. Wang, M. Ma, H. Liu, Z. Zhang, W. Zhou and H. Liu, *Chem. Eng. J.*, 2021, **420**, 127686.
- 11 S. Yang, W. Zhu and X. Wang, *Rare Metals*, 2011, **30**, 488-495.
- 12 D. R. Liyanage, D. Li, Q. B. Cheek, H. Baydoun and S. L. Brock, *J. Mater. Chem. A*, 2017, **5**, 17609-17618.
- 13 W. Feng, Y. Feng, J. Chen, H. Wang, Y. Hu, T. Luo, C. Yuan, L. Cao, L. Feng and J. Huang, *Chem. Eng. J.*, 2022, **437**, 135456.
- 14 D. T. Tran, S. Prabhakaran, D. H. Kim, N. Hameed, H. Wang, N. H. Kim and J. H. Lee, *Nano Energy*, 2021, **88**, 106277.
- 15 A. Wang, J. Lin, H. Xu, Y. Tong and G. Li, *J. Mater. Chem. A*, 2016, **4**, 16992-16999.
- 16 Y. Zhang, Y. Liu, M. Ma, X. Ren, Z. Liu, G. Du, A. M. Asiri and X. Sun, *Chem. Commun.*, 2017, **53**, 11048-11051.
- 17 Y. Lin, L. He, T. Chen, D. Zhou, L. Wu, X. Hou and C. Zheng, *J. Mater. Chem. A*, 2018, **6**, 4088-4094.
- 18 Y. Yan, J. Lin, K. Bao, T. Xu, J. Qi, J. Cao, Z. Zhong, W. Fei and J. Feng, *J. Colloid Interf. Sci.*, 2019, **552**, 332-336.
- 19 R. Zhang, G. Wang, Z. Wei, X. Teng, J. Wang, J. Miao, Y. Wang, F. Yang, X. Zhu, C. Chen, E. Zhou, W. Hu and X. Sun, *J. Mater. Chem. A*, 2021, **9**, 1221-1229.
- 20 Q. He, D. Tian, H. Jiang, D. Cao, S. Wei, D. Liu, P. Song, Y. Lin and L. Song, *Adv. Mater.*, 2020, **32**, 1906972.
- 21 S. Ibraheem, X. Li, S. S. A. Shah, T. Najam, G. Yasin, R. Iqbal, S. Hussain, W. Ding and F. Shahzad, *ACS Appl. Mater. Inter.*, 2021, **13**, 10972-10978.
- 22 A. Kong, M. Peng, H. Gu, S. Zhao, Y. Lv, M. Liu, Y. Sun, S. Dai, Y. Fu, J. Zhang and W. Li, *Chem. Eng. J.*, 2021, **426**, 131234.
- 23 J. Hu, S. Zhu, Y. Liang, S. Wu, Z. Li, S. Luo and Z. Cui, *J. Colloid Interf. Sci.*, 2021, **587**, 79-89.
- 24 M. Qu, Y. Jiang, M. Yang, S. Liu, Q. Guo, W. Shen, M. Li and R. He, *Applied Catalysis B: Environmental*, 2020, **263**, 118324.
- 25 D. Chen, Z. Pu, R. Lu, P. Ji, P. Wang, J. Zhu, C. Lin, H. W. Li, X. Zhou and Z. Hu, *Adv. Energy*

- Mater.*, 2020, **10**, 2000814.
- 26 D. Chen, R. Lu, Z. Pu, J. Zhu, H. Li, F. Liu, S. Hu, X. Luo, J. Wu and Y. Zhao, *Applied Catalysis B: Environmental*, 2020, **279**, 119396.
- 27 J. Wang, W. Fang, Y. Hu, Y. Zhang, J. Dang, Y. Wu, B. Chen, H. Zhao and Z. Li, *Applied Catalysis B: Environmental*, 2021, **298**, 120490.
- 28 W. Feng, Y. Feng, J. Chen, H. Wang, Y. Hu, T. Luo, C. Yuan, L. Cao, L. Feng and J. Huang, *Chem. Eng. J.*, 2022, **437**, 135456.
- 29 Y. Xu, T. Ren, K. Ren, S. Yu, M. Liu, Z. Wang, X. Li, L. Wang and H. Wang, *Chem. Eng. J.*, 2021, **408**, 127308.
- 30 A. Kong, M. Peng, H. Gu, S. Zhao, Y. Lv, M. Liu, Y. Sun, S. Dai, Y. Fu and J. Zhang, *Chem. Eng. J.*, 2021, **426**, 131234.
- 31 D. T. Tran, S. Prabhakaran, D. H. Kim, N. Hameed, H. Wang, N. H. Kim and J. H. Lee, *Nano Energy*, 2021, **88**, 106277.
- 32 Q. Gao, W. Luo, X. Ma, Z. Ma, S. Li, F. Gou, W. Shen, Y. Jiang, R. He and M. Li, *Applied Catalysis B: Environmental*, 2022, **310**, 121356.
